# Supplementary material for: OPED: an optimal prime editing guide RNA designer based on deep learning and transfer learning
Source: Research Square preprint supplement (doi:10.21203/rs.3.rs-2340162/v1), 2023-01-25
Supplement: Supplementary file 1 [file 472401d22017f3969aa451d1.xlsx]

## Sheet: Table S7
Supplementary Table 7. Primer sequences used for cell genomic DNA amplification and deep sequencing
Gene	Forward primer	Reverse primer
ABCC8	GAAGCAGACCAACGAGATGC	ATCTCAAGGCCTCCTGCTTC
ARSA	TTAGAGGTGTGGGGCCACTG	CATCAAGGTTGGGGTGGTGG
COL4A5	GGTCTACCAGGTCCAGAAGG	GCCAGTGAGCCACACATAGA
DKC1	ATTGCATTAATGACCACAGC	CTCTGTGAGAAACACCCAAG
GZF1	TGGGAGGAAGGTCTTTGTGG	TCTCCCCTTCTTCGTCCTCC
HSD17B4	GGTCTCTGAATTACCTATAA	TGCAAATACCTCAAACAAGC
MTR	GGCAAAAAAGGGGAATCTTT	GCTAAGAGTTCTTCTACCAT
PAH	GGTCCCCGACTCCCTCTGCT	TGTACTCATAGCAAGCATGG
PALB2	CAACCTAAGAGTCTTAGCCTGG	GTCAGTTTCCTCATTGGAAAGG
RORB	TCTTTAGGAGGAGCCAGCAG	CTTATCCCCAATTCCCTCATC
BRCA2	GGGGAGAAAGAGATTGATGACC	CGTCAGCTATTGAATTACTTTCC
CLRN1	TCATGCCAAGCCAACAGAAG	ATGAGAACCGAAAGGGCCTT
COL2A1	CCTGTGTTTCCGGGGATTCC	AAGTCCCACGCAGGCAGTGA
COL4A4	CGGAAGCTGTCAAGCAGCCA	TCTTTTCCATCACATCCTGG
FANCA	AGGACTCAGAATGCTGGGGG	CAAACCCGTCTGATTCTGGG
GALT	AGATTTTCCAGCGGATCCCC	TCGTACAGGCCTGCAGACTG
HNRNPK	GACAGAATGCCTCCTGGTCG	CCACTAAGTGCAGCCTCTTG
LDLR	GGCTGTTTCTTCCAGAATTC	GGCTGTCCTGCGAACATACC
PAX6	GGGATATAATGCTCTTGGAG	CTCTTGGGTAAAGGATGTTC
PUF60	TAGACCAGTTGGCTGAGGAG	GTGGGCAGGAGCAGCAGTGAG
BMPR2	GTGCCTGAAGGGGATGAAAA	GGGAACTTGGGTCTCTGTTT
CANT1	TTGTGGGTGCTGCCATCCTC	GACAGGGTCAGGTAGCCCTT
FBN1	AGGTCAAGATGGACACCCAG	CTCCTTACCGATACACGCGG
KMT2A	AATACTTCATCTCACCGAAC	ATTCAAGACAGAGGAACTGG
MSH6	GATTTGGTTTGGGCCAAGAT	CCTGTCTGTCTGTTTCTCTC
PIK3R1	GGATCAAGTTGTCAAAGAAG	TCTCACCCCCACCTCATTCG
PKHD1	GGTCAAAGGAGGACACAGGA	AAATGTAGAGGTAAGGCCAC
SDHD	TTTTGTAGCTGGCTCCAAGG	AGGGCATTTCAATCAACTTC
UMOD	GTTACGACGTGCACCTGTCA	CCACATTGACACATGTGGCC
USH2A	CATTCATCAAGTAAGTGGAGG	TGTGGAATTGTGAGACCCTC
