# Supplementary material for: OPED: an optimal prime editing guide RNA designer based on deep learning and transfer learning
Source: Research Square preprint supplement (doi:10.21203/rs.3.rs-2340162/v1), 2023-01-25
Supplement: Supplementary file 2 [file b5a18818d6264f0af77f0ee8.xlsx]

## Sheet: Table S6
Supplementary Table 6. Primer sequences of the scaffold
NO.	Forward Primer
scaffold-F	AGAGCTAGAAATAGCAAGTTAAAATAAGGCTAGTCCGTTATCAACTTGAAAAAGTGGCACCGAGTCG
scaffold-R	GCACCGACTCGGTGCCACTTTTTCAAGTTGATAACGGACTAGCCTTATTTTAACTTGCTATTTCTAG
