# Supplementary material for: OPED: an optimal prime editing guide RNA designer based on deep learning and transfer learning
Source: Research Square preprint supplement (doi:10.21203/rs.3.rs-2340162/v1), 2023-01-25
Supplement: Supplementary file 3 [file b62a9c516591b670240d7573.xlsx]

## Sheet: NG PAM
Supplementary Table 4. Analysis of candidate pegRNAs for correcting or installing ClinVar pathogenic variants with an NG or NGG PAM
Correcting ClinVar variants (NG PAM)
Variant Type	Number of variants	Targetable variants	% Targetable	Number of pegRNAs	Mean pegRNAs per variant	Mean edit-to-nick distance
SNV	51473	51473	1	527326019	10244.7	20.15
Insertion	1833	1833	1	18269053	9966.75	19.97
Deletion	24432	24432	1	233196700	9544.72	19.32
Total	77738	77738	1	778791772	10018.2	19.81
Installing ClinVar variants (NG PAM)
Variant Type	Number of variants	Targetable variants	% Targetable	Number of pegRNAs	Mean pegRNAs per variant	Mean edit-to-nick distance
SNV	51473	51473	1	542781954	10545	19.72
Insertion	1833	1833	1	16815216	9173.6	19.35
Deletion	24432	24432	1	253831281	10389.3	19.82
Total	77738	77738	1	813428451	10463.7	19.63
ClinVar database accessed September 29, 2021

## Sheet: NGG PAM
Supplementary Table 4. Analysis of candidate pegRNAs for correcting or installing ClinVar pathogenic variants with an NG or NGG PAM
Correcting ClinVar variants (NGG PAM)
Variant Type	Number of variants	Targetable variants	% Targetable	Number of pegRNAs	Mean pegRNAs per variant	Mean edit-to-nick distance
SNV	51473	50761	0.986168	144531827	2847.3	20.57
Insertion	1833	1773	0.967267	4660997	2628.88	20.25
Deletion	24432	23936	0.979699	64266906	2684.95	19.07
Total	77738	76470	0.983689	213459730	2791.42	19.96
Installing ClinVar variants (NGG PAM)
Variant Type	Number of variants	Targetable variants	% Targetable	Number of pegRNAs	Mean pegRNAs per variant	Mean edit-to-nick distance
SNV	51473	50924	0.989334	152685709	2998.31	19.75
Insertion	1833	1780	0.971086	4399142	2471.43	19.26
Deletion	24432	23946	0.980108	71950692	3004.71	19.17
Total	77738	76650	0.986004	229035543	2988.07	19.39
ClinVar database accessed September 29, 2021
