# Supplementary material for: OPED: an optimal prime editing guide RNA designer based on deep learning and transfer learning
Source: Research Square preprint supplement (doi:10.21203/rs.3.rs-2340162/v1), 2023-01-25
Supplement: Supplementary file 4 [file c7fd1cac3950dc66946c832b.xlsx]

## Sheet: Table S3
Supplementary Table 3. The optimal PE designs of OPED to install 30 human pathogenic genetic variants from the ClinVar database with PE2, PE3/PE3b and ePE editing strategies
ClinVarAlleleID	VariantType	GeneID	GeneSymbol	HGNC_ID	Chromosome	Start	Stop	ReferenceAllele	AlternateAllele	EditingStrand	Spacer	3'-extension sequence	sgRNA sequence	PBS length (bp)	RTT length (bp)
357951	SNV	6833	ABCC8	59	11	17442719	17442719	C	A	+	GCTGTGTGGGGTGAACTCAC	CATCTCCATTGAGTTCACCC	GGAGAACATCTTCCGCACGC	9	11
79053	SNV	410	ARSA	713	22	50626208	50626208	C	T	-	TGGAAAGGGAACGACCTACG	TCGGACACCGCCCTTGTAGGTCGTTCCC	CTCTCGGACACCGCCCTTGT	11	17
1246255	SNV	1287	COL4A5	2207	X	108677631	108677631	C	T	+	TCAAGGACCACCAGGACTCC	CCTACCTAGAGTCCTGGTGG	ATCTACTTCCATTTCCTACC	10	10
379257	SNV	1736	DKC1	2890	X	154773227	154773227	G	A	-	GGACCTAAACCCCACTTCCG	CTTACCCTCAGAAGTGGGGT	GAGACACTTACCCTCAGAAG	9	11
431979	SNV	64412	GZF1	15808	20	23365248	23365248	G	T	+	CCAGGCAGGTGCTGAGTTGG	CAATTCCTACAACTCAGCAC	TCCTCCTCCTCTTCCTCCTC	9	11
39184	SNV	3295	HSD17B4	5213	5	119489219	119489219	A	G	+	AGCCCTGAAGCCAGAGTATG	ACAAGAGGTGCCACACACTCTGGCTTCA	ACTAATAAGAGAAAACAGGA	12	16
29325	SNV	4548	MTR	7468	1	236852578	236852578	C	T	+	AACTTGTCCTTCTCCTTCCG	CATTCCTCAGAAGGAGAAGG	AATGGCTTCCATTCCTCAGA	10	10
15670	SNV	5053	PAH	8582	12	102855315	102855315	C	A	+	CCTCCATGTATTCCACTCGA	CCCATCCCTCTAGTGGAATAC	TGGGCAGCCCATCCCTCTAG	10	11
152126	SNV	79728	PALB2	26144	16	23635288	23635288	G	A	-	GAAGCATGTCCAATTGCCAG	CTTTCCTCTAGCAATTGGAC	ACTCTGAATGACAGCCTCCA	10	10
226916	SNV	6096	RORB	10259	9	74634755	74634755	T	C	+	CTGCAGAAGTGTCTTGCCCT	CATTCCTGGGGCAAGACAC	ACCATCTCTTGACATTCCTG	9	10
1230135	Insertion	675	BRCA2	1101	13	32398414	32398415	C	CA	+	AGAAGGCATTTCAGCCACCA	CAACTCCTTGTGTGGCTGAAAT	TGGTGCCACAACTCCTTGTG	10	12
1059653	Insertion	7401	CLRN1	12605	3	150972560	150972561	G	GGACA	-	GCTCTGCTCGTCAATGCCTC	CCCTGGACAAGGCATTGACGA	TCCAGCTCCTGCCCTGGACA	10	11
171761	Insertion	1280	COL2A1	2200	12	47976889	47976890	C	CAG	-	CCCCAGAGGTGACAAAGGAG	GGCTCTCCAGCCTCAGTCCTTTGTCACCTC	AGTGACACTCACAGGAGGGC	12	18
553580	Insertion	1286	COL4A4	2206	2	227030554	227030555	T	TGA	-	GGAGTGTTGACCTTCTGAGA	CTCCCCTCTGACAGAAGGTC	CCTGGAAAGCCTTTGTATCC	9	11
1168730	Insertion	2175	FANCA	3582	16	89808329	89808330	T	TACTC	-	GTGTGGCATCTTCACGTACA	CCTTGTACTCACGTGAAGA	ACCTTTCCAGCAGCTCTTGC	9	10
265202	Insertion	2592	GALT	4135	9	34646775	34646776	T	TA	-	GCAGTTACCGTTTGCCCGGA	CAACCTTACCGGGCAAACG	CGCCGCAGCAGCAACCTTAC	9	10
222923	Insertion	3190	HNRNPK	5044	9	83971903	83971904	G	GAA	+	CCTCTAGGTGGTGGTGGTGG	CTTCCTCTTCACCACCACCA	GATGATATGAGCCCTCGTCG	9	11
246258	Insertion	3949	LDLR	6547	19	11116152	11116153	G	GC	+	GAAAGGGGGCCTGAATGGTG	GAGTAGATGTCCACACGCATTCAGGC	GTGCCCGGCCCTGGCTGGGA	9	17
526296	Insertion	5080	PAX6	8620	11	31794775	31794776	T	TG	-	TCCAGATGGCTGCCAGCAAC	CTTCCTGTGTGCTGGCAGC	TCCCCCTCCTTCCTGTGTGC	9	10
963647	Insertion	22827	PUF60	17042	8	143817932	143817933	A	AGTGTG	+	GCAGGACTTGATCTTGCCAA	GCCTTCACACTGGCAAGATCAA	CGTGTTTGAGGCCTTCACAC	10	12
414286	Deletion	659	BMPR2	1078	2	202542310	202542310	AG	A	-	CTCTGGTACGGATTCCCCTG	CAAATCCACAGGGAATCCG	TTCTTTTCTACAAATCCACA	9	10
192560	Deletion	124583	CANT1	19721	17	78997345	78997345	CA	C	+	TCCTTTGTGGGGGAGACAGG	ACAATGACACCTACCCCCGTCTCCCCC	CCCACCGCCCGGCCCCCGGC	9	18
672173	Deletion	2200	FBN1	3603	15	48487399	48487403	CCTCGG	C	-	AGAGATCCTCTCCTATGCCG	CAAACACCACCATAGGAGA	GTTATGGCAAACACCACCAT	9	10
805674	Deletion	4297	KMT2A	7132	11	118505813	118505813	AG	A	-	GCAGTTCCTCCCACACTCTG	CTGTTACCACAAGTGTGGGA	TAGCATCATGTATTTTGAAC	9	11
419437	Deletion	2956	MSH6	7329	2	47791089	47791089	GC	G	+	ATGACAGCCCAACAAGGGGC	CTAACCCACCCCTTGTTGGG	CACACACAAACACACACACA	10	10
815950	Deletion	5295	PIK3R1	8979	5	68293831	68293835	CCCAGG	C	+	AGAATATACCCGCACATCCC	AGAAAACTCAGATGTGCGGG	ATTTTCATAGAAAACTCACC	9	11
455634	Deletion	5314	PKHD1	9016	6	52017599	52017599	AC	A	-	CCTGTGTGGCCTGAAGCGTG	CTGTCCTCCTCAGCTTCAGGC	AAGCAGTTGCTCTGTCGCCA	9	12
183478	Deletion	6392	SDHD	10683	11	112088992	112088995	CCTCA	C	-	CCAGTGACCATGAAGAGTGA	TTCCCTGGCTGCAGCCCTCTTCATGGTCAC	GGTTGTCAGTGTTTTGCTCC	14	16
1174340	Deletion	7369	UMOD	12559	16	20349012	20349014	CCTT	C	-	TTCTCCTGCGTCTGCCCCGA	GGCGACAGGCGGAAGCCGGGGCAGACGCAGGA	ACCGGGCGACAGGCGGAAGC	14	18
57505	Deletion	7399	USH2A	12601	1	215786866	215786867	CTT	C	+	GCAGAGGATCCTGCACTCTT	CAGGAAACCAGAGTGCAGGA	TCACCCCTGCCACTTGACTC	9	11
