# Supplementary material for: OPED: an optimal prime editing guide RNA designer based on deep learning and transfer learning
Source: Research Square preprint supplement (doi:10.21203/rs.3.rs-2340162/v1), 2023-01-25
Supplement: Supplementary file 5 [file cee3f7662f8cb291381b2bc2.xlsx]

## Sheet: Table S5
Supplementary Table 5. Primer sequences used for constructing the pegRNA-GFP plasmid
NO.	Forward Primer
pegRNA-bone-F	AGCTAGGTCTCCTTTTTTTAAAGAATTCTCGACCTCGAGAC
pegRNA-bone-F	TCTCTCGGTCTCACGGTGTTTCGT
