# Supplementary material for: OPED: an optimal prime editing guide RNA designer based on deep learning and transfer learning
Source: Research Square preprint supplement (doi:10.21203/rs.3.rs-2340162/v1), 2023-01-25
Supplement: Supplementary file 6 [file d0689f738acb249e0c9d9dac.xlsx]

## Sheet: Table S1
Supplementary Table 1. Performance comparison of OPED with DeepPE, PE_type, PE_position and nine other machine learning models on HT-test, Type-test and Position-test sets
Method	HT-test				Type-test				Position-test
	r	R	MAE	RMSE	r	R	MAE	RMSE	r	R	MAE	RMSE
OPED	0.769	0.798	0.0428	0.0601	0.612	0.624	0.0532	0.0691	0.628	0.562	0.0414	0.0517
DeepPE	0.747	0.799	0.0449	0.0612	0.398	0.398	0.0728	0.0906	0.444	0.334	0.048	0.0612
PE_type	Na	Na	Na	Na	0.48	0.47	Na	Na	Na	Na	Na	Na
PE_position	Na	Na	Na	Na	Na	Na	Na	Na	0.56	0.56	Na	Na
GRU+ Attention	0.728	0.783	0.045	0.0633	0.556	0.568	0.0605	0.0799	0.62	0.608	0.0475	0.0591
SVR	0.672	0.734	0.0504	0.0684	0.224	0.171	0.0702	0.0855	0.284	0.263	0.0529	0.0638
MLP	0.711	0.742	0.0513	0.0673	0.434	0.453	0.0671	0.0872	0.475	0.514	0.0553	0.0716
KNN	0.612	0.677	0.0531	0.0734	0.249	0.221	0.0724	0.0907	0.02	0.048	0.0659	0.0792
DT	0.52	0.587	0.0617	0.0877	0.265	0.284	0.0811	0.1057	0.211	0.196	0.0711	0.0906
RF	0.703	0.754	0.0476	0.065	0.578	0.573	0.0573	0.0714	0.356	0.332	0.0509	0.0629
AdaBoost	0.699	0.752	0.0468	0.0661	0.559	0.52	0.0581	0.0721	0.387	0.359	0.0502	0.0617
GBDT	0.723	0.776	0.0467	0.0635	0.59	0.596	0.0573	0.071	0.471	0.47	0.0471	0.0593
XGBoost	0.722	0.776	0.0468	0.0636	0.584	0.589	0.0569	0.071	0.468	0.464	0.0469	0.0594
Abbreviations:
r	Pearson correlation coefficient
R	Spearman correlation coefficient
MAE	Mean absolute error
RMSE	Root mean squared error
GRU+ Attention	A custom deep learning model based on bidirectional Gated Recurrent Unit and Attention mechanism
SVR	Support Vector Regression
MLP	Multi-layer Perceptron
KNN	K-Nearest Neighbors
DT	Decision Tree
RF	Random Forest
GBDT	Gradient Boosted Decision Trees
Na	Not available
