# Supplementary material for: OPED: an optimal prime editing guide RNA designer based on deep learning and transfer learning
Source: Research Square preprint supplement (doi:10.21203/rs.3.rs-2340162/v1), 2023-01-25
Supplement: Supplementary file 7 [file f1323ee34d9e4c7bfe11dadf.xlsx]

## Sheet: Table S2
Supplementary Table 2. Eight published pegRNA sets at genomic sites HEK4, EMX1, RNF2 and HEK3 for validation of OPED
pegRNA set	pegRNA id	spacer	RTT	PBS	genetype
HEK4_2a	HEK4_2a_7	GGCACTGCGGCTGGAGGTGG	GCTTTAACCCCAA	cctccag	+2_G-to-T
	HEK4_2a_8	GGCACTGCGGCTGGAGGTGG	GCTTTAACCCCAA	cctccagc	+2_G-to-T
	HEK4_2a_9	GGCACTGCGGCTGGAGGTGG	GCTTTAACCCCAA	cctccagcc	+2_G-to-T
	HEK4_2a_10	GGCACTGCGGCTGGAGGTGG	GCTTTAACCCCAA	cctccagccg	+2_G-to-T
	HEK4_2a_11	GGCACTGCGGCTGGAGGTGG	GCTTTAACCCCAA	cctccagccgc	+2_G-to-T
	HEK4_2a_12	GGCACTGCGGCTGGAGGTGG	GCTTTAACCCCAA	cctccagccgca	+2_G-to-T
	HEK4_2a_13	GGCACTGCGGCTGGAGGTGG	GCTTTAACCCCAA	cctccagccgcag	+2_G-to-T
	HEK4_2a_14	GGCACTGCGGCTGGAGGTGG	GCTTTAACCCCAA	cctccagccgcagt	+2_G-to-T
	HEK4_2a_15	GGCACTGCGGCTGGAGGTGG	GCTTTAACCCCAA	cctccagccgcagtg	+2_G-to-T
HEK4_2b	HEK4_2b_7	GGCACTGCGGCTGGAGGTGG	ACCCCAA	CCTCCAGCCGC	+2_G-to-T
	HEK4_2b_8	GGCACTGCGGCTGGAGGTGG	AACCCCAA	CCTCCAGCCGC	+2_G-to-T
	HEK4_2b_9	GGCACTGCGGCTGGAGGTGG	TAACCCCAA	CCTCCAGCCGC	+2_G-to-T
	HEK4_2b_10	GGCACTGCGGCTGGAGGTGG	TTAACCCCAA	CCTCCAGCCGC	+2_G-to-T
	HEK4_2b_11	GGCACTGCGGCTGGAGGTGG	TTTAACCCCAA	CCTCCAGCCGC	+2_G-to-T
	HEK4_2b_12	GGCACTGCGGCTGGAGGTGG	CTTTAACCCCAA	CCTCCAGCCGC	+2_G-to-T
	HEK4_2b_13	GGCACTGCGGCTGGAGGTGG	GCTTTAACCCCAA	CCTCCAGCCGC	+2_G-to-T
	HEK4_2b_14	GGCACTGCGGCTGGAGGTGG	CGCTTTAACCCCAA	CCTCCAGCCGC	+2_G-to-T
	HEK4_2b_15	GGCACTGCGGCTGGAGGTGG	CCGCTTTAACCCCAA	CCTCCAGCCGC	+2_G-to-T
	HEK4_2b_16	GGCACTGCGGCTGGAGGTGG	TCCGCTTTAACCCCAA	CCTCCAGCCGC	+2_G-to-T
	HEK4_2b_17	GGCACTGCGGCTGGAGGTGG	CTCCGCTTTAACCCCAA	CCTCCAGCCGC	+2_G-to-T
	HEK4_2b_18	GGCACTGCGGCTGGAGGTGG	TCTCCGCTTTAACCCCAA	CCTCCAGCCGC	+2_G-to-T
	HEK4_2b_19	GGCACTGCGGCTGGAGGTGG	GTCTCCGCTTTAACCCCAA	CCTCCAGCCGC	+2_G-to-T
	HEK4_2b_20	GGCACTGCGGCTGGAGGTGG	AGTCTCCGCTTTAACCCCAA	CCTCCAGCCGC	+2_G-to-T
EMX1_2a	EMX1_2a_9	GAGTCCGAGCAGAAGAAGAA	ATGGGAGCACTTC	TTCTTCTGC	+5_G-to-T
	EMX1_2a_10	GAGTCCGAGCAGAAGAAGAA	ATGGGAGCACTTC	TTCTTCTGCT	+5_G-to-T
	EMX1_2a_11	GAGTCCGAGCAGAAGAAGAA	ATGGGAGCACTTC	TTCTTCTGCTC	+5_G-to-T
	EMX1_2a_12	GAGTCCGAGCAGAAGAAGAA	ATGGGAGCACTTC	TTCTTCTGCTCG	+5_G-to-T
	EMX1_2a_13	GAGTCCGAGCAGAAGAAGAA	ATGGGAGCACTTC	TTCTTCTGCTCGG	+5_G-to-T
	EMX1_2a_14	GAGTCCGAGCAGAAGAAGAA	ATGGGAGCACTTC	TTCTTCTGCTCGGA	+5_G-to-T
	EMX1_2a_15	GAGTCCGAGCAGAAGAAGAA	ATGGGAGCACTTC	TTCTTCTGCTCGGAC	+5_G-to-T
	EMX1_2a_16	GAGTCCGAGCAGAAGAAGAA	ATGGGAGCACTTC	TTCTTCTGCTCGGACT	+5_G-to-T
	EMX1_2a_17	GAGTCCGAGCAGAAGAAGAA	ATGGGAGCACTTC	TTCTTCTGCTCGGACTC	+5_G-to-T
EMX1_2b	EMX1_2b_10	GAGTCCGAGCAGAAGAAGAA	GGAGCCCTTG	TTCTTCTGCTCGG	+1_G-to-C
	EMX1_2b_11	GAGTCCGAGCAGAAGAAGAA	GGGAGCCCTTG	TTCTTCTGCTCGG	+1_G-to-C
	EMX1_2b_12	GAGTCCGAGCAGAAGAAGAA	TGGGAGCCCTTG	TTCTTCTGCTCGG	+1_G-to-C
	EMX1_2b_13	GAGTCCGAGCAGAAGAAGAA	ATGGGAGCCCTTG	TTCTTCTGCTCGG	+1_G-to-C
	EMX1_2b_14	GAGTCCGAGCAGAAGAAGAA	GATGGGAGCCCTTG	TTCTTCTGCTCGG	+1_G-to-C
	EMX1_2b_15	GAGTCCGAGCAGAAGAAGAA	TGATGGGAGCCCTTG	TTCTTCTGCTCGG	+1_G-to-C
	EMX1_2b_16	GAGTCCGAGCAGAAGAAGAA	GTGATGGGAGCCCTTG	TTCTTCTGCTCGG	+1_G-to-C
	EMX1_2b_17	GAGTCCGAGCAGAAGAAGAA	TGTGATGGGAGCCCTTG	TTCTTCTGCTCGG	+1_G-to-C
	EMX1_2b_18	GAGTCCGAGCAGAAGAAGAA	ATGTGATGGGAGCCCTTG	TTCTTCTGCTCGG	+1_G-to-C
	EMX1_2b_19	GAGTCCGAGCAGAAGAAGAA	GATGTGATGGGAGCCCTTG	TTCTTCTGCTCGG	+1_G-to-C
	EMX1_2b_20	GAGTCCGAGCAGAAGAAGAA	TGATGTGATGGGAGCCCTTG	TTCTTCTGCTCGG	+1_G-to-C
HEK3_2b	HEK3_2b_10	GGCCCAGACTGAGCACGTGA	TCTGCCATCT	CGTGCTCAGTCTG	+1_T-to-A
	HEK3_2b_11	GGCCCAGACTGAGCACGTGA	CTCTGCCATCT	CGTGCTCAGTCTG	+1_T-to-A
	HEK3_2b_12	GGCCCAGACTGAGCACGTGA	CCTCTGCCATCT	CGTGCTCAGTCTG	+1_T-to-A
	HEK3_2b_13	GGCCCAGACTGAGCACGTGA	TCCTCTGCCATCT	CGTGCTCAGTCTG	+1_T-to-A
	HEK3_2b_14	GGCCCAGACTGAGCACGTGA	TTCCTCTGCCATCT	CGTGCTCAGTCTG	+1_T-to-A
	HEK3_2b_15	GGCCCAGACTGAGCACGTGA	TTTCCTCTGCCATCT	CGTGCTCAGTCTG	+1_T-to-A
	HEK3_2b_16	GGCCCAGACTGAGCACGTGA	CTTTCCTCTGCCATCT	CGTGCTCAGTCTG	+1_T-to-A
	HEK3_2b_17	GGCCCAGACTGAGCACGTGA	CCTTTCCTCTGCCATCT	CGTGCTCAGTCTG	+1_T-to-A
	HEK3_2b_18	GGCCCAGACTGAGCACGTGA	TCCTTTCCTCTGCCATCT	CGTGCTCAGTCTG	+1_T-to-A
	HEK3_2b_19	GGCCCAGACTGAGCACGTGA	TTCCTTTCCTCTGCCATCT	CGTGCTCAGTCTG	+1_T-to-A
	HEK3_2b_20	GGCCCAGACTGAGCACGTGA	CTTCCTTTCCTCTGCCATCT	CGTGCTCAGTCTG	+1_T-to-A
RNF2_2a	RNF2_2a_9	GTCATCTTAGTCATTACCTG	GAACACCTCAT	GTAATGACT	+1_C-to-A
	RNF2_2a_10	GTCATCTTAGTCATTACCTG	GAACACCTCAT	GTAATGACTA	+1_C-to-A
	RNF2_2a_11	GTCATCTTAGTCATTACCTG	GAACACCTCAT	GTAATGACTAA	+1_C-to-A
	RNF2_2a_12	GTCATCTTAGTCATTACCTG	GAACACCTCAT	GTAATGACTAAG	+1_C-to-A
	RNF2_2a_13	GTCATCTTAGTCATTACCTG	GAACACCTCAT	GTAATGACTAAGA	+1_C-to-A
	RNF2_2a_14	GTCATCTTAGTCATTACCTG	GAACACCTCAT	GTAATGACTAAGAT	+1_C-to-A
	RNF2_2a_15	GTCATCTTAGTCATTACCTG	GAACACCTCAT	GTAATGACTAAGATG	+1_C-to-A
	RNF2_2a_16	GTCATCTTAGTCATTACCTG	GAACACCTCAT	GTAATGACTAAGATGA	+1_C-to-A
	RNF2_2a_17	GTCATCTTAGTCATTACCTG	GAACACCTCAT	GTAATGACTAAGATGAC	+1_C-to-A
EMX1_ED6	EMX1_ED6a_C5	GAGTCCGAGCAGAAGAAGAA	GTGATGGGAGTCCTTC	TTCTTCTGCTCGGA	+6_G-to-A
	EMX1_ED6a_C6	GAGTCCGAGCAGAAGAAGAA	GTGATGGGAGCTCTTC	TTCTTCTGCTCGGA	+5_G-to-A
	EMX1_ED6a_C7	GAGTCCGAGCAGAAGAAGAA	GTGATGGGAGCCTTTC	TTCTTCTGCTCGGA	+4_G-to-A
	EMX1_ED6c_C5_6	GAGTCCGAGCAGAAGAAGAA	GTGATGGGAGTTCTTC	TTCTTCTGCTCGGA	+5+6_G-to-A
	EMX1_ED6c_C5_7	GAGTCCGAGCAGAAGAAGAA	GTGATGGGAGTCTTTC	TTCTTCTGCTCGGA	+4+6_G-to-A
	EMX1_ED6c_C6_7	GAGTCCGAGCAGAAGAAGAA	GTGATGGGAGCTTTTC	TTCTTCTGCTCGGA	+4+5_G-to-A
	EMX1_ED6c_C5_6_7	GAGTCCGAGCAGAAGAAGAA	GTGATGGGAGTTTTTC	TTCTTCTGCTCGGA	+4+5+6_G-to-A
HEK3_ED6	HEK3_ED6a_C3	GGCCCAGACTGAGCACGTGA	TCTGTCATCA	CGTGCTCAGTCTG	+6_G-to-A
	HEK3_ED6a_C4	GGCCCAGACTGAGCACGTGA	TCTGCTATCA	CGTGCTCAGTCTG	+5_G-to-A
	HEK3_ED6a_C7	GGCCCAGACTGAGCACGTGA	TCTGCCATTA	CGTGCTCAGTCTG	+2_G-to-A
	HEK3_ED6d_A5	GGCCCAGACTGAGCACGTGA	TCTGCCGTCA	CGTGCTCAGTCTG	+4_T-to-C
	HEK3_ED6d_A8	GGCCCAGACTGAGCACGTGA	TCTGCCATCG	CGTGCTCAGTCTG	+1_T-to-C
